# Supplementary material for: Genome-wide characterization and expression analysis of theDofgene family related to abiotic stress in watermelon
Source: PeerJ journal article supplement (doi:10.7717/peerj.8358), 2020-02-17

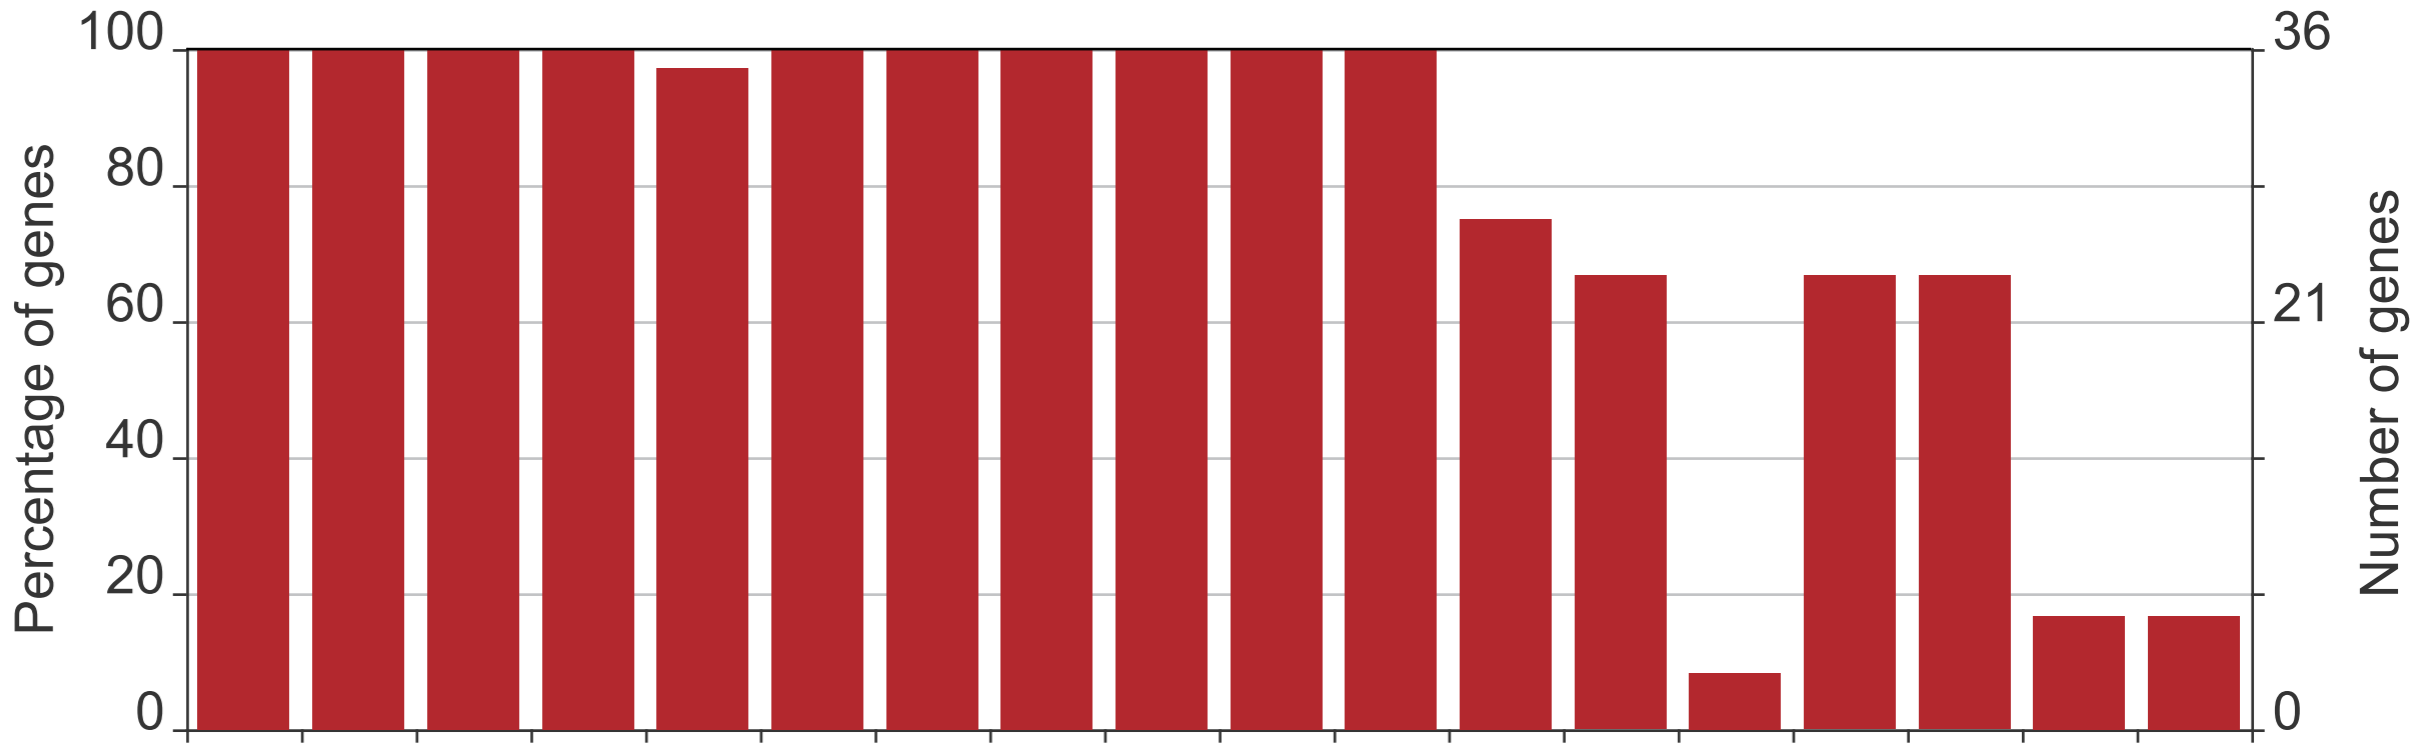

Molecular Function  
Cellular Component

Biological Process

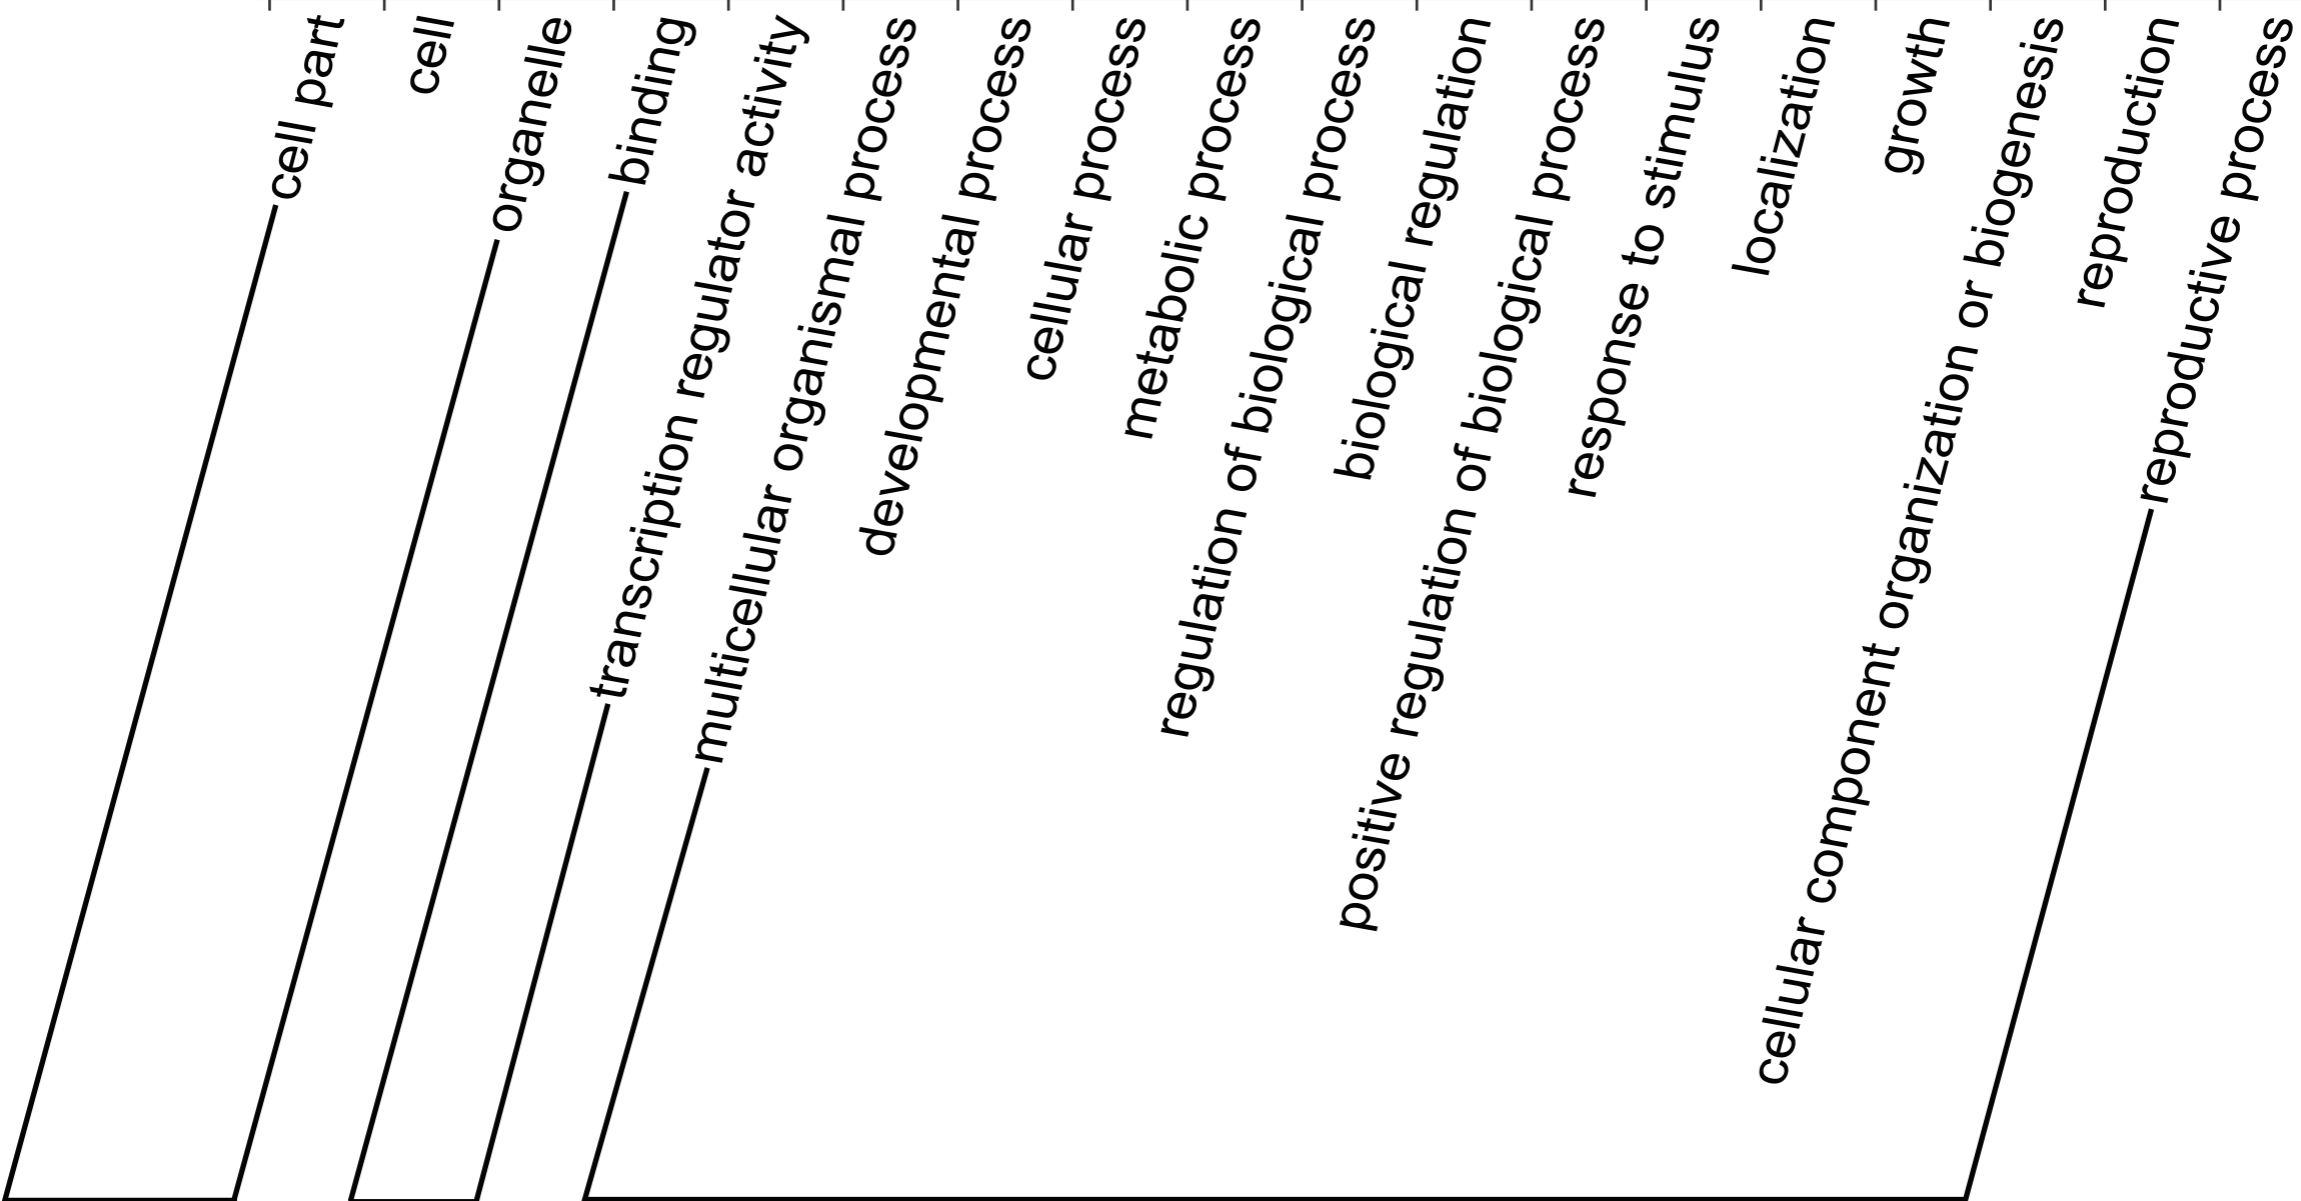

Supplement: Fig._S1.pdf [file Fig._S1.pdf]
