# Supplementary material for: Genome-wide characterization and expression analysis of the Dof gene family related to abiotic stress in watermelon
Source: PeerJ. 2020 Feb 17;8:e8358. doi: 10.7717/peerj.8358 (PMC7032062; doi:10.7717/peerj.8358)
Supplement: Supplemental Information 1 [file peerj-08-8358-s001.xlsx]

## Sheet: watermelon
ClDof1	Cla000091
ClDof2	Cla000604
ClDof3	Cla004880
ClDof4	Cla011343
ClDof5	Cla000975
ClDof6	Cla001812
ClDof7	Cla001818
ClDof8	Cla014094
ClDof9	Cla001373
ClDof10	Cla009627
ClDof11	Cla009628
ClDof12	Cla009692
ClDof13	Cla013297
ClDof14	Cla000540
ClDof15	Cla008250
ClDof16	Cla005059
ClDof17	Cla019672
ClDof18	Cla019705
ClDof19	Cla019706
ClDof20	Cla018219
ClDof21	Cla018604
ClDof22	Cla021140
ClDof23	Cla004274
ClDof24	Cla010192
ClDof25	Cla006705
ClDof26	Cla019034
ClDof27	Cla019107
ClDof28	Cla004013
ClDof29	Cla012621
ClDof30	Cla013851
ClDof31	Cla022532
ClDof32	Cla004676
ClDof33	Cla016993
ClDof34	Cla002907
ClDof35	Cla017622
ClDof36	Cla017890

## Sheet: cucumber
CsDof01	Csa1G009790
CsDof02	Csa1G015610
CsDof03	Csa1G033250
CsDof04	Csa1G039960
CsDof05	Csa1G046080
CsDof06	Csa1G074960
CsDof07	Csa1G074970
CsDof08	Csa1G089510
CsDof09	Csa1G475990
CsDof10	Csa1G505950
CsDof11	Csa2G360720
CsDof12	Csa3G115040
CsDof13	Csa3G119420
CsDof14	Csa3G238150
CsDof15	Csa3G734310
CsDof16	Csa3G782640
CsDof17	Csa3G782640
CsDof18	Csa3G825020
CsDof19	Csa3G849890
CsDof20	Csa4G295460
CsDof21	Csa5G139210
CsDof22	Csa5G148660
CsDof23	Csa5G182030
CsDof24	Csa5G515000
CsDof25	Csa5G605720
CsDof26	Csa6G103520
CsDof27	Csa6G191030
CsDof28	Csa6G289740
CsDof29	Csa6G338090
CsDof30	Csa6G490030
CsDof31	Csa6G490130
CsDof32	Csa6G497370
CsDof33	Csa6G517150
CsDof34	Csa6G517940
CsDof35	Csa6G517950
CsDof36	Csa6G519570

## Sheet:  Arabidopsis
AtDof1.1	At1g07640
AtDof1.2	At1g21340
AtDof1.3	At1g26790
AtDof1.4	At1g28310
AtDof1.5	At1g29160
AtDof1.6	At1g47650
AtDof1.7	At1g51700
AtDof1.8	At1g64620
AtDof1.10	At1g69570
AtDof2.1	At2g28510
AtDof2.2	At2g28810
AtDof2.3	At2g34140
AtDof2.4	At2g37590
AtDof2.5	At2g46590
AtDof3.1	At3g21270
AtDof3.2	At3g45610
AtDof3.3	At3g47500
AtDof3.4	At3g50410
AtDof3.5	At3g52440
AtDof3.6	At3g55370
AtDof3.7	At3g61850
AtDof4.1	At4g00940
AtDof4.2	At4g21030
AtDof4.3	At4g21040
AtDof4.4	At4g21050
AtDof4.5	At4g21080
AtDof4.6	At4g24060
AtDof4.7	At4g38000
AtDof5.1	At5g02460
AtDof5.2	At5g39660
AtDof5.3	At5g60200
AtDof5.4	At5g60850
AtDof5.5	At5g62430
AtDof5.6	At5g62940
AtDof5.7	At5g65590
AtDof5.8	At5g66940

## Sheet: rice
OsDof1	P0505D12
OsDof2	P0453A06
OsDof3	P0001B06
OsDof4	P0038F12
OsDof5	P0007F06
OsDof6	B1131G08
OsDof7	49D11
OsDof8	B1121A12
OsDof9	P0657H12
OsDof10	OSJNBa0009N02
OsDof11	OSJNBa0010D22
OsDof12	OSJNBa0091P11
OsDof13	OSJNBa0063J18
OsDof14	OSJNBa0002D01
OsDof15	OSJNBa0079B15
OsDof16	OJ1754_E06
OsDof17	OSJNBa0064G10
OsDof18	OSJNB0005N02
OsDof19	P0016H04
OsDof20	P0491D10
OsDof21	P0407H12
OsDof22	P0483G08
OsDof23	OSJNBa0060O17
OsDof24	P0605H02
OsDof25	P0556A05
OsDof26	OSJNBa0060A14
OsDof27	OSJNBa0066I08
OsDof28	OSJNBa0016C14
OsDof29	CL012178.39
OsDof30	CL037947.70
