# Supplementary material for: Genome-wide characterization and expression analysis of the Dof gene family related to abiotic stress in watermelon
Source: PeerJ. 2020 Feb 17;8:e8358. doi: 10.7717/peerj.8358 (PMC7032062; doi:10.7717/peerj.8358)
Supplement: Supplemental Information 2 [file peerj-08-8358-s002.xlsx]

## Sheet: Sheet1
Table S1. Primers sequences used in qRT-PCR.
Gene	Gene ID	Forward primer (5'to3')	Reverse primer (5'to3')
ClDof2	Cla000604	CACAACTTTATTCAACCCAT	GTTATTACTATTCCACCCACTC
ClDof3	Cla004880	CAATCTTCCCTCCAAACA	ACCATTCTCAAACCCTTC
ClDof5	Cla000975	AAACGAGGAGTCAGGGATGG	AAGTAACGAGGCTGGGAAAG
ClDof8	Cla014094	CACATCGGATCATAATCAGCA	CCCACCTTTGGTCCAGTATCT
ClDof11	Cla009628	TCATCCTGCCATCTCCTTCG	TTGTCTGTTGCCGTTGTTCC
ClDof20	Cla018219	ACAGCAAGCCAACAATCT	GACACTTCAGTGCCGTCT
ClDof21	Cla018604	AAAACCCTAAAGAAGCCTGAT	CGTGATGTGACGGTAATAAGA
ClDof22	Cla021140	GGAGGCGATGATGGAGTC	ATTTGCACCTTGGGCAGT
ClDof27	Cla019107	CCACAACCCTGTTCACCAAA	TTAATACCAAGTGTCTCCCATA
ClDof29	Cla012621	TAAATGTCCTCGTTGTGATTCTAC	AGTACCGACGGCAATTCTTAC
ClDof35	Cla017622	TTTTGTGAACCAGAAGGCAGAC	CCGCCACTTCAATGTTATCC
ClDof36	Cla017890	TCACTCAGCCTCGCCACTTT	CTGCTCCCTTTGCTTCTTTT
