# Supplementary material for: Genome-wide characterization and expression analysis of the Dof gene family related to abiotic stress in watermelon
Source: PeerJ. 2020 Feb 17;8:e8358. doi: 10.7717/peerj.8358 (PMC7032062; doi:10.7717/peerj.8358)
Supplement: Supplemental Information 6 [file peerj-08-8358-s006.xlsx]

## Sheet: GO analysis
Table S5. GO analysis of the watermelon Dof family proteins.
gene name	Gene ID	GO_annotation
ClDof1	Cla000091	Molecular Function: transcription factor activity, sequence-specific DNA binding (GO:0003700);; Molecular Function: binding (GO:0005488);; Cellular Component: nucleus (GO:0005634);; Biological Process: determination of bilateral symmetry (GO:0009855);; Biological Process: polarity specification of adaxial/abaxial axis (GO:0009944);; Biological Process: meristem initiation (GO:0010014);; Biologica…
ClDof10	Cla009627	Molecular Function: transcription factor activity, sequence-specific DNA binding (GO:0003700);; Cellular Component: nucleus (GO:0005634);; Biological Process: determination of bilateral symmetry (GO:0009855);; Biological Process: polarity specification of adaxial/abaxial axis (GO:0009944);; Biological Process: meristem initiation (GO:0010014);; Biological Process: guard cell differentiation (GO:0…
ClDof11	Cla009628	Molecular Function: transcription factor activity, sequence-specific DNA binding (GO:0003700);; Molecular Function: binding (GO:0005488);; Cellular Component: nucleus (GO:0005634);; Biological Process: determination of bilateral symmetry (GO:0009855);; Biological Process: polarity specification of adaxial/abaxial axis (GO:0009944);; Biological Process: meristem initiation (GO:0010014);; Biologica…
ClDof12	Cla009692	Molecular Function: transcription factor activity, sequence-specific DNA binding (GO:0003700);; Molecular Function: binding (GO:0005488);; Cellular Component: nucleus (GO:0005634);; Biological Process: regulation of transcription, DNA-templated (GO:0006355);; Biological Process: guard cell differentiation (GO:0010052);; Biological Process: xylem development (GO:0010089);; Biological Process: stom…
ClDof13	Cla013297	Molecular Function: DNA binding (GO:0003677);; Molecular Function: transcription factor activity, sequence-specific DNA binding (GO:0003700);; Cellular Component: nucleus (GO:0005634);; Biological Process: regulation of transcription, DNA-templated (GO:0006355);; Biological Process: determination of bilateral symmetry (GO:0009855);; Biological Process: polarity specification of adaxial/abaxial ax…
ClDof14	Cla000540	Molecular Function: transcription factor activity, sequence-specific DNA binding (GO:0003700);; Cellular Component: nucleus (GO:0005634);; Biological Process: pattern specification process (GO:0007389);; Biological Process: guard cell differentiation (GO:0010052);; Biological Process: xylem development (GO:0010089);; Biological Process: stomatal movement (GO:0010118);; Molecular Function: sequenc…
ClDof15	Cla008250	Molecular Function: transcription factor activity, sequence-specific DNA binding (GO:0003700);; Cellular Component: nucleus (GO:0005634);; Biological Process: purine nucleobase transport (GO:0006863);; Biological Process: determination of bilateral symmetry (GO:0009855);; Biological Process: polarity specification of adaxial/abaxial axis (GO:0009944);; Biological Process: meristem initiation (GO:…
ClDof16	Cla005059	Molecular Function: DNA binding (GO:0003677);; Molecular Function: transcription factor activity, sequence-specific DNA binding (GO:0003700);; Cellular Component: nucleus (GO:0005634);; Biological Process: regulation of transcription, DNA-templated (GO:0006355);; Biological Process: xylem development (GO:0010089);; Biological Process: response to chitin (GO:0010200);; Biological Process: cell wal…
ClDof17	Cla019672	Molecular Function: transcription factor activity, sequence-specific DNA binding (GO:0003700);; Molecular Function: binding (GO:0005488);; Cellular Component: nucleus (GO:0005634);; Biological Process: regulation of transcription, DNA-templated (GO:0006355);; Biological Process: guard cell differentiation (GO:0010052);; Biological Process: xylem development (GO:0010089);; Biological Process: stom…
ClDof18	Cla019705	Molecular Function: DNA binding (GO:0003677);; Cellular Component: nucleus (GO:0005634);; Biological Process: regulation of transcription, DNA-templated (GO:0006355);; Biological Process: anatomical structure morphogenesis (GO:0009653);; Biological Process: tissue development (GO:0009888);; Biological Process: response to chitin (GO:0010200);; Biological Process: single-organism developmental pro…
ClDof19	Cla019706	Molecular Function: transcription factor activity, sequence-specific DNA binding (GO:0003700);; Cellular Component: nucleus (GO:0005634);; Biological Process: determination of bilateral symmetry (GO:0009855);; Biological Process: polarity specification of adaxial/abaxial axis (GO:0009944);; Biological Process: meristem initiation (GO:0010014);; Biological Process: guard cell differentiation (GO:0…
ClDof2	Cla000604	Molecular Function: DNA binding (GO:0003677);; Molecular Function: transcription factor activity, sequence-specific DNA binding (GO:0003700);; Molecular Function: binding (GO:0005488);; Cellular Component: nucleus (GO:0005634);; Biological Process: regulation of transcription, DNA-templated (GO:0006355);; Biological Process: post-embryonic development (GO:0009791);; Biological Process: determinat…
ClDof20	Cla018219	Molecular Function: transcription factor activity, sequence-specific DNA binding (GO:0003700);; Cellular Component: nucleus (GO:0005634);; Biological Process: determination of bilateral symmetry (GO:0009855);; Biological Process: polarity specification of adaxial/abaxial axis (GO:0009944);; Biological Process: meristem initiation (GO:0010014);; Biological Process: guard cell differentiation (GO:0…
ClDof21	Cla018604	Molecular Function: transcription factor activity, sequence-specific DNA binding (GO:0003700);; Cellular Component: nucleus (GO:0005634);; Biological Process: determination of bilateral symmetry (GO:0009855);; Biological Process: polarity specification of adaxial/abaxial axis (GO:0009944);; Biological Process: meristem initiation (GO:0010014);; Biological Process: guard cell differentiation (GO:0…
ClDof22	Cla021140	Molecular Function: DNA binding (GO:0003677);; Molecular Function: transcription factor activity, sequence-specific DNA binding (GO:0003700);; Cellular Component: nucleus (GO:0005634);; Biological Process: regulation of transcription, DNA-templated (GO:0006355);; Biological Process: determination of bilateral symmetry (GO:0009855);; Biological Process: polarity specification of adaxial/abaxial ax…
ClDof23	Cla004274	Molecular Function: transcription factor activity, sequence-specific DNA binding (GO:0003700);; Cellular Component: nucleus (GO:0005634);; Biological Process: determination of bilateral symmetry (GO:0009855);; Biological Process: polarity specification of adaxial/abaxial axis (GO:0009944);; Biological Process: meristem initiation (GO:0010014);; Biological Process: guard cell differentiation (GO:0…
ClDof24	Cla010192	Molecular Function: transcription factor activity, sequence-specific DNA binding (GO:0003700);; Cellular Component: nucleus (GO:0005634);; Biological Process: determination of bilateral symmetry (GO:0009855);; Biological Process: polarity specification of adaxial/abaxial axis (GO:0009944);; Biological Process: meristem initiation (GO:0010014);; Biological Process: guard cell differentiation (GO:0…
ClDof25	Cla006705	Molecular Function: transcription factor activity, sequence-specific DNA binding (GO:0003700);; Cellular Component: nucleus (GO:0005634);; Biological Process: pattern specification process (GO:0007389);; Biological Process: guard cell differentiation (GO:0010052);; Biological Process: xylem development (GO:0010089);; Biological Process: stomatal movement (GO:0010118);; Molecular Function: sequenc…
ClDof26	Cla019034	Molecular Function: transcription factor activity, sequence-specific DNA binding (GO:0003700);; Cellular Component: nucleus (GO:0005634);; Biological Process: guard cell differentiation (GO:0010052);; Biological Process: xylem development (GO:0010089);; Biological Process: stomatal movement (GO:0010118);; Biological Process: response to chitin (GO:0010200);; Molecular Function: sequence-specific …
ClDof27	Cla019107	Molecular Function: DNA binding (GO:0003677);; Molecular Function: transcription factor activity, sequence-specific DNA binding (GO:0003700);; Cellular Component: nucleus (GO:0005634);; Biological Process: regulation of transcription, DNA-templated (GO:0006355);; Biological Process: determination of bilateral symmetry (GO:0009855);; Biological Process: polarity specification of adaxial/abaxial ax…
ClDof28	Cla004013	Molecular Function: DNA binding (GO:0003677);; Molecular Function: transcription factor activity, sequence-specific DNA binding (GO:0003700);; Cellular Component: nucleus (GO:0005634);; Biological Process: regulation of transcription, DNA-templated (GO:0006355);; Biological Process: determination of bilateral symmetry (GO:0009855);; Biological Process: polarity specification of adaxial/abaxial ax…
ClDof29	Cla012621	Molecular Function: transcription factor activity, sequence-specific DNA binding (GO:0003700);; Molecular Function: binding (GO:0005488);; Cellular Component: nucleus (GO:0005634);; Biological Process: nitrogen compound metabolic process (GO:0006807);; Biological Process: determination of bilateral symmetry (GO:0009855);; Biological Process: polarity specification of adaxial/abaxial axis (GO:0009…
ClDof3	Cla004880	Molecular Function: transcription factor activity, sequence-specific DNA binding (GO:0003700);; Cellular Component: nucleus (GO:0005634);; Biological Process: guard cell differentiation (GO:0010052);; Biological Process: stomatal movement (GO:0010118);; Molecular Function: sequence-specific DNA binding (GO:0043565);; Biological Process: positive regulation of transcription, DNA-templated (GO:0045…
ClDof30	Cla013851	Molecular Function: transcription factor activity, sequence-specific DNA binding (GO:0003700);; Cellular Component: nucleus (GO:0005634);; Biological Process: pattern specification process (GO:0007389);; Biological Process: guard cell differentiation (GO:0010052);; Biological Process: xylem development (GO:0010089);; Biological Process: stomatal movement (GO:0010118);; Molecular Function: sequenc…
ClDof31	Cla022532	Molecular Function: transcription factor activity, sequence-specific DNA binding (GO:0003700);; Cellular Component: nucleus (GO:0005634);; Biological Process: purine nucleobase transport (GO:0006863);; Biological Process: guard cell differentiation (GO:0010052);; Biological Process: xylem development (GO:0010089);; Biological Process: stomatal movement (GO:0010118);; Biological Process: response …
ClDof32	Cla004676	Molecular Function: transcription factor activity, sequence-specific DNA binding (GO:0003700);; Cellular Component: nucleus (GO:0005634);; Biological Process: determination of bilateral symmetry (GO:0009855);; Biological Process: polarity specification of adaxial/abaxial axis (GO:0009944);; Biological Process: meristem initiation (GO:0010014);; Biological Process: guard cell differentiation (GO:0…
ClDof33	Cla016993	Molecular Function: transcription factor activity, sequence-specific DNA binding (GO:0003700);; Cellular Component: nucleus (GO:0005634);; Biological Process: determination of bilateral symmetry (GO:0009855);; Biological Process: polarity specification of adaxial/abaxial axis (GO:0009944);; Biological Process: meristem initiation (GO:0010014);; Biological Process: guard cell differentiation (GO:0…
ClDof34	Cla002907	Molecular Function: DNA binding (GO:0003677);; Molecular Function: transcription factor activity, sequence-specific DNA binding (GO:0003700);; Cellular Component: nucleus (GO:0005634);; Biological Process: regulation of transcription, DNA-templated (GO:0006355);; Biological Process: determination of bilateral symmetry (GO:0009855);; Biological Process: polarity specification of adaxial/abaxial ax…
ClDof35	Cla017622	Molecular Function: transcription factor activity, sequence-specific DNA binding (GO:0003700);; Cellular Component: nucleus (GO:0005634);; Biological Process: determination of bilateral symmetry (GO:0009855);; Biological Process: polarity specification of adaxial/abaxial axis (GO:0009944);; Biological Process: meristem initiation (GO:0010014);; Biological Process: guard cell differentiation (GO:0…
ClDof36	Cla017890	Molecular Function: DNA binding (GO:0003677);; Molecular Function: transcription factor activity, sequence-specific DNA binding (GO:0003700);; Cellular Component: nucleus (GO:0005634);; Biological Process: purine nucleobase transport (GO:0006863);; Biological Process: determination of bilateral symmetry (GO:0009855);; Biological Process: polarity specification of adaxial/abaxial axis (GO:0009944)…
ClDof4	Cla011343	Molecular Function: transcription factor activity, sequence-specific DNA binding (GO:0003700);; Cellular Component: nucleus (GO:0005634);; Biological Process: determination of bilateral symmetry (GO:0009855);; Biological Process: polarity specification of adaxial/abaxial axis (GO:0009944);; Biological Process: meristem initiation (GO:0010014);; Biological Process: guard cell differentiation (GO:0…
ClDof5	Cla000975	Molecular Function: transcription factor activity, sequence-specific DNA binding (GO:0003700);; Cellular Component: nucleus (GO:0005634);; Biological Process: determination of bilateral symmetry (GO:0009855);; Biological Process: polarity specification of adaxial/abaxial axis (GO:0009944);; Biological Process: meristem initiation (GO:0010014);; Biological Process: guard cell differentiation (GO:0…
ClDof6	Cla001812	Molecular Function: DNA binding (GO:0003677);; Molecular Function: transcription factor activity, sequence-specific DNA binding (GO:0003700);; Molecular Function: protein binding (GO:0005515);; Cellular Component: nucleus (GO:0005634);; Biological Process: response to auxin (GO:0009733);; Biological Process: response to salicylic acid (GO:0009751);; Biological Process: guard cell differentiation …
ClDof7	Cla001818	Molecular Function: transcription factor activity, sequence-specific DNA binding (GO:0003700);; Cellular Component: nucleus (GO:0005634);; Biological Process: determination of bilateral symmetry (GO:0009855);; Biological Process: polarity specification of adaxial/abaxial axis (GO:0009944);; Biological Process: meristem initiation (GO:0010014);; Biological Process: guard cell differentiation (GO:0…
ClDof8	Cla014094	Molecular Function: DNA binding (GO:0003677);; Molecular Function: transcription factor activity, sequence-specific DNA binding (GO:0003700);; Cellular Component: nucleus (GO:0005634);; Biological Process: regulation of transcription, DNA-templated (GO:0006355);; Biological Process: post-embryonic development (GO:0009791);; Biological Process: determination of bilateral symmetry (GO:0009855);; Bi…
ClDof9	Cla001373	Molecular Function: transcription factor activity, sequence-specific DNA binding (GO:0003700);; Cellular Component: nucleus (GO:0005634);; Biological Process: guard cell differentiation (GO:0010052);; Biological Process: stomatal movement (GO:0010118);; Biological Process: response to chitin (GO:0010200);; Molecular Function: sequence-specific DNA binding (GO:0043565);; Biological Process: positi…
