# Supplementary material for: Genome-wide characterization and expression analysis of the Dof gene family related to abiotic stress in watermelon
Source: PeerJ. 2020 Feb 17;8:e8358. doi: 10.7717/peerj.8358 (PMC7032062; doi:10.7717/peerj.8358)
Supplement: Supplemental Information 7 [file peerj-08-8358-s007.xlsx]

## Sheet: Sheet1
Figure 6. Expression profiles of nine selected ClDof genes in various tissues determined by qRT-PCR
	ClDof2			ClDof5			ClDof8			ClDof11			ClDof21			ClDof27			ClDof29			ClDof35			ClDof36
	Expression	Expression SEM		Expression	Expression SEM		Expression	Expression SEM		Expression	Expression SEM		Expression	Expression SEM		Expression	Expression SEM		Expression	Expression SEM		Expression	Expression SEM		Expression	Expression SEM
Mature leaves	1	0.114234		1	0.122279		1	0.134308		1	0.102916		1	0.105176		1	0.117751		1	0.149166		1	0.0630401		1	0.105445
Expanding leaves	1.78176	0.177042		59.5377	5.58584		0.340932	0.0269942		0.632606	0.0412572		0.304817	0.0299674		0.412805	0.0442582		3.16199	0.347259		1.35485	0.0599706		0.487287	0.0015698
Roots	0.026865	0.00428547		13.1953	1.29527		0.00661529	0.000616466		0.187679	0.0279472		0.199553	0.0106386		0.278874	0.0149551		9.2686	0.884526		0.0534815	0.00419676		0.869395	0.077965
Stems	0.0112904	0.000677251		8.37051	0.546996		0.0101778	0.000549631		0.307373	0.0280081		0.125921	0.0111835		0.1	0.01		3.94139	0.222152		0.0322892	0.00210991		0.319856	0.0548887
Tendrils	0.0186177	0.00264279		3.68742	0.595034		0.0366668	0.00559063		0.402538	0.036692		0.0328291	0.00316795		0.0562682	0.00883076		5.85004	0.831245		0.0160867	0.00167638		0.164231	0.0177464
Flowers	0.1358	0.0100032		0.803628	0.066927		0.212326	0.000909338		2.10814	0.197682		0.547463	0.0321699		1.2247	0.0852276		19.851	1.64492		0.541362	0.0400265		3.70446	0.5437
Fruits	0.279825	0.053625		37.2725	5.28119		0.38401	0.0429369		2.9258	0.378111		0.865209	0.0855967		2.38122	0.47367		32.0803	3.18156		1.00839	0.123656		6.97807	0.26673
Stem apexes	0.847719	0.071628		14.9395	1.95733		0.374738	0.0437221		0.421094	0.010403		0.0580521	0.00528744		0.168058	0.0152313		8.0853	0.729418		0.311265	0.0436434		0.895212	0.0776895
Figure 7. Expression profiles of nine selected ClDof genes in response to salt stress determined by qRT-PCR
	ClDof2			ClDof5			ClDof8			ClDof11			ClDof21			ClDof27			ClDof29			ClDof35			ClDof36
Treatment	Expression	Expression SEM		Expression	Expression SEM		Expression	Expression SEM		Expression	Expression SEM		Expression	Expression SEM		Expression	Expression SEM		Expression	Expression SEM		Expression	Expression SEM		Expression	Expression SEM
CK	1	0.0669598		1	0.0408377		1	0.045762		1	0.0702401		1	0.0392125		1	0.037503		1	0.0409043		1.00038	0.0390585		1	0.0380914
1h	0.193073	0.00820019		7.1889	0.348122		1.10283	0.0789654		0.137951	0.00822911		0.307997	0.00949827		0.806372	0.0414857		8.51877	0.496736		7.22872	1.05355		0.410589	0.0252074
3h	0.566009	0.0300117		9.88674	0.538102		1.42233	0.0992056		0.217111	0.00968535		0.220721	0.0110226		1.14406	0.0781021		46.5752	3.07395		1.79501	0.166206		0.80815	0.0772678
9h	0.209085	0.0106503		12.3251	1.23477		0.710613	0.0178871		0.11429	0.00399221		0.256317	0.016017		0.44291	0.017557		70.9761	7.04282		0.30458	0.0194081		1.19567	0.083594
24h	0.380713	0.0271161		29.4371	2.10334		1.38294	0.145		0.217284	0.01486		0.752675	0.0619652		0.754468	0.0504612		27.1307	2.13293		0.328881	0.0443111		3.19039	0.337564
Figure 8. Expression profiles of nine selected ClDof genes under ABA treatment determined by qRT-PCR.
	ClDof2			ClDof5			ClDof8			ClDof11			ClDof21			ClDof27			ClDof29			ClDof35			ClDof36
Treatment	Expression	Expression SEM		Expression	Expression SEM		Expression	Expression SEM		Expression	Expression SEM		Expression	Expression SEM		Expression	Expression SEM		Expression	Expression SEM		Expression	Expression SEM		Expression	Expression SEM
CK	1	0.0324665		1	0.0532635		1	0.0194386		1	0.0189827		1	0.0653418		1	0.0914445		1	0.0467503		1.0099	0.0569369		1	0.0491774
1h	0.194041	0.0188158		23.1789	1.90693		0.980564	0.0862846		0.186142	0.0124672		0.324963	0.0228881		0.649687	0.0765423		4.4104	0.406359		2.28545	0.113029		0.528768	0.0388853
3h	0.555628	0.0462178		0.663127	0.0675944		1.20427	0.0926727		0.132319	0.0129513		0.138432	0.010675		1.29208	0.146076		3.85295	0.496366		2.57747	0.104552		0.754462	0.0836871
9h	0.351046	0.0238521		5.7952	0.410741		0.821716	0.0433145		0.348936	0.0130461		0.984495	0.0631832		0.369615	0.0204189		17.61	1.60302		1.66757	0.121378		2.58513	0.220323
24h	1.48972	0.038036		4.52923	0.373418		1.68989	0.219135		0.870591	0.0593627		1.26116	0.0346783		1.30302	0.118119		5.74045	0.447999		3.91879	0.35296		3.0222	0.202534
